# Supplementary material for: Together is better: How mixtures of organic filters mitigate the photocatalytic activity of TiO 2 and ZnO
Source: Research Square preprint supplement (doi:10.21203/rs.3.rs-6314741/v1), 2025-04-07
Supplement: Supplementary file 1 [file fbf1ee9bea61c0f0bb428c40.docx]

**Supplementary Information**

Together is better: How mixtures of organic filters mitigate the photocatalytic activity of TiO2 and ZnO

Mattia Battistin1,, Alessia Minisini2, Andrea Brunetta1, Fabio Brunetta1, Dario Voinovich2,Dritan Hasa2,*and Greta Camilla Magnano2,3,*

1Kalis Srl, Via Caodevilla 38, 31040 Pederobba, Italy

2Department of Chemical and Pharmaceutical Sciences, University of Trieste, Piazzale Europa 1, 34127 Trieste, Italy

3Clinical Unit of Occupational Medicine, University of Trieste, Via della Pietà 2/2, 34129 Trieste, Italy

*Corresponding authors: [dhasa@units.it ; gmagnano@units.it](mailto:email:%20dhasa@units.it%20;%20gmagnano@units.it)

**Photocatalytic Activity Analysis: Reaction Order and Degradation**


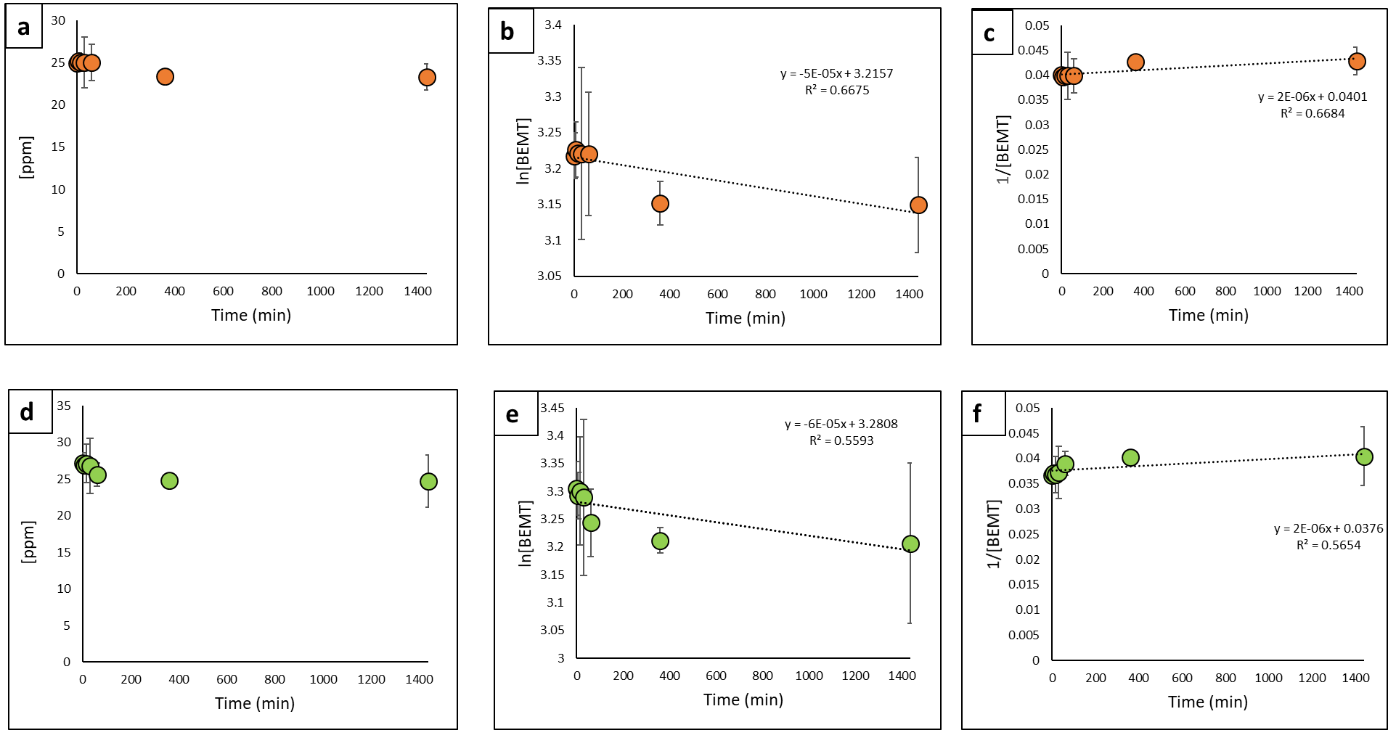


**Figure S1: a)** degradation of BEMT in 24h for ZnO; **b)** BEMT degradation by ZnO fitted with first order equation; **c)** data fitted with second order equation; **d)** degradation of BEMT in 24h for TiO2; **e)** BEMT degradation by TiO2 fitted with first order equation; **f)** data fitted with second order equation.


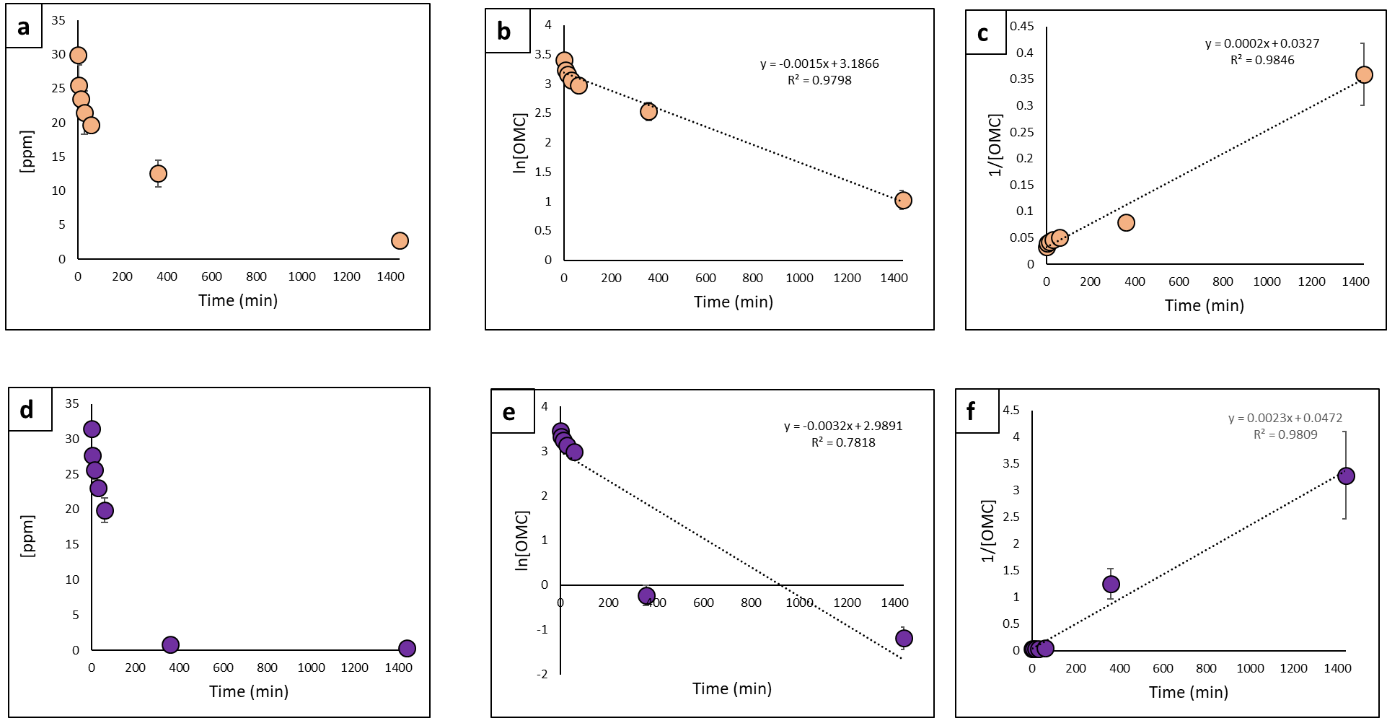


**Figure S2: a)** degradation of OMC in 24h for ZnO; **b)** OMC degradation by ZnO fitted with first order equation; **c)** data fitted with second order equation; **d)** degradation of OMC in 24h for TiO2; **e)** OMC degradation by TiO2 fitted with first order equation; **f)** data fitted with second order equation.


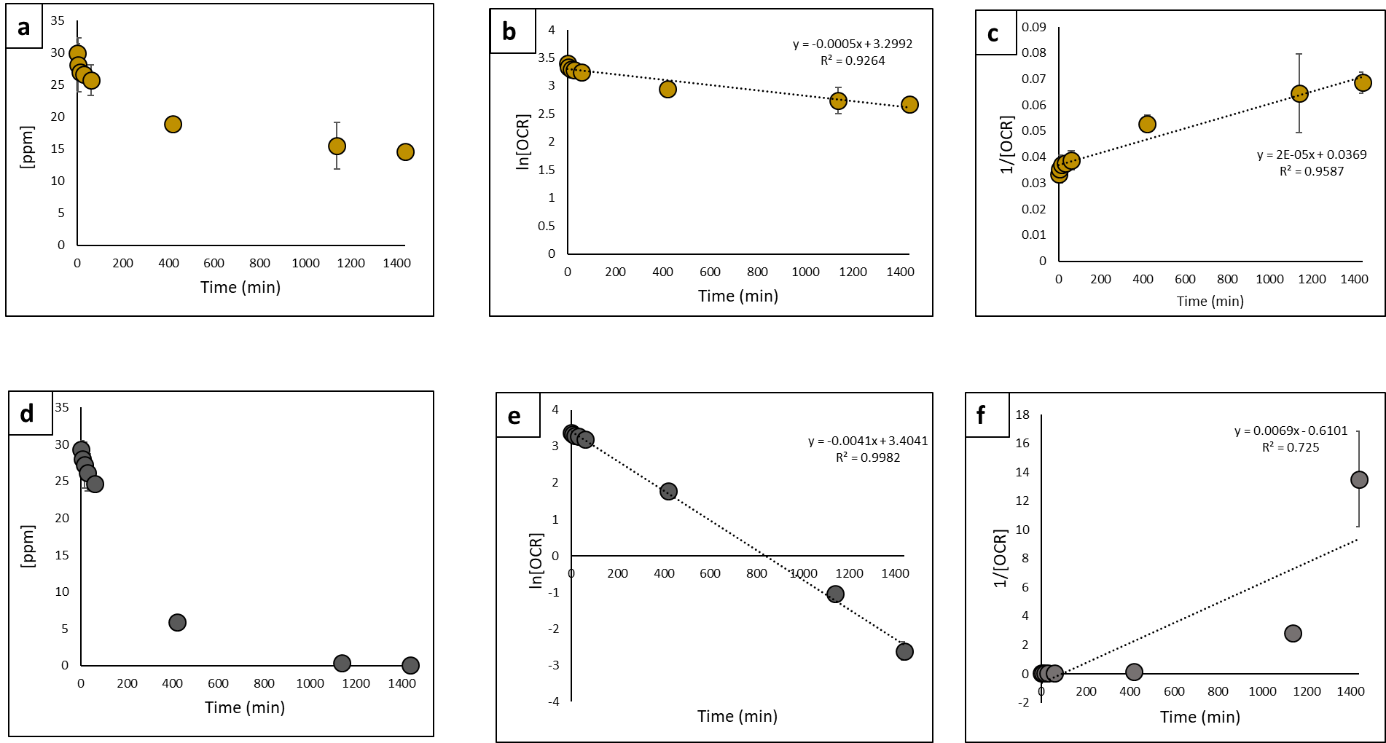


**Figure S3: a)** degradation of OCR in 24h for ZnO; **b)** OCR degradation by ZnO fitted with first order equation; **c)** data fitted with second order equation; **d)** degradation of OCR in 24h for TiO2; **e)** OCR degradation by TiO2 fitted with first order equation; **f)** data fitted with second order equation.


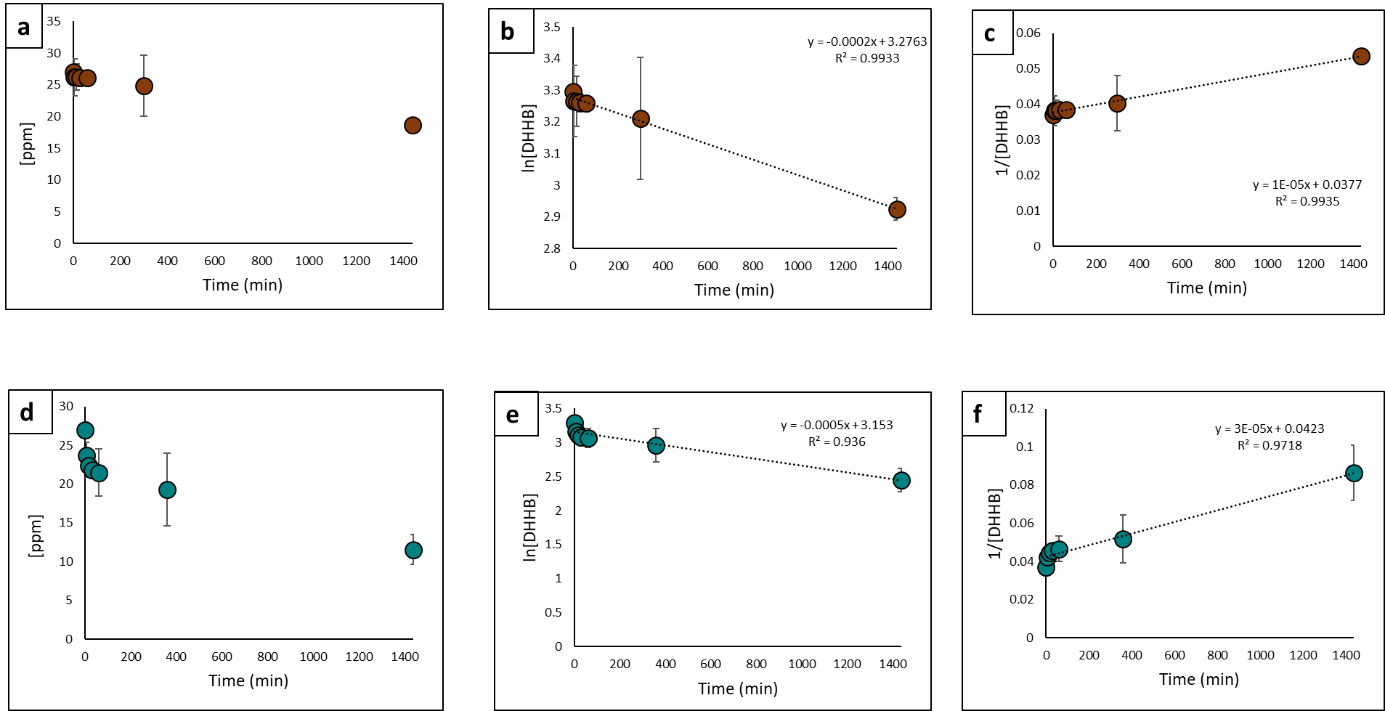


**Figure S4: a)** degradation of DHHB in 24h for ZnO; **b)** DHHB degradation by ZnO fitted with first order equation; **c)** data fitted with second order equation; **d)** degradation of DHHB in 24h for TiO2; **e)** DHHB degradation by TiO2 fitted with first order equation; **f)** data fitted with second order equation.


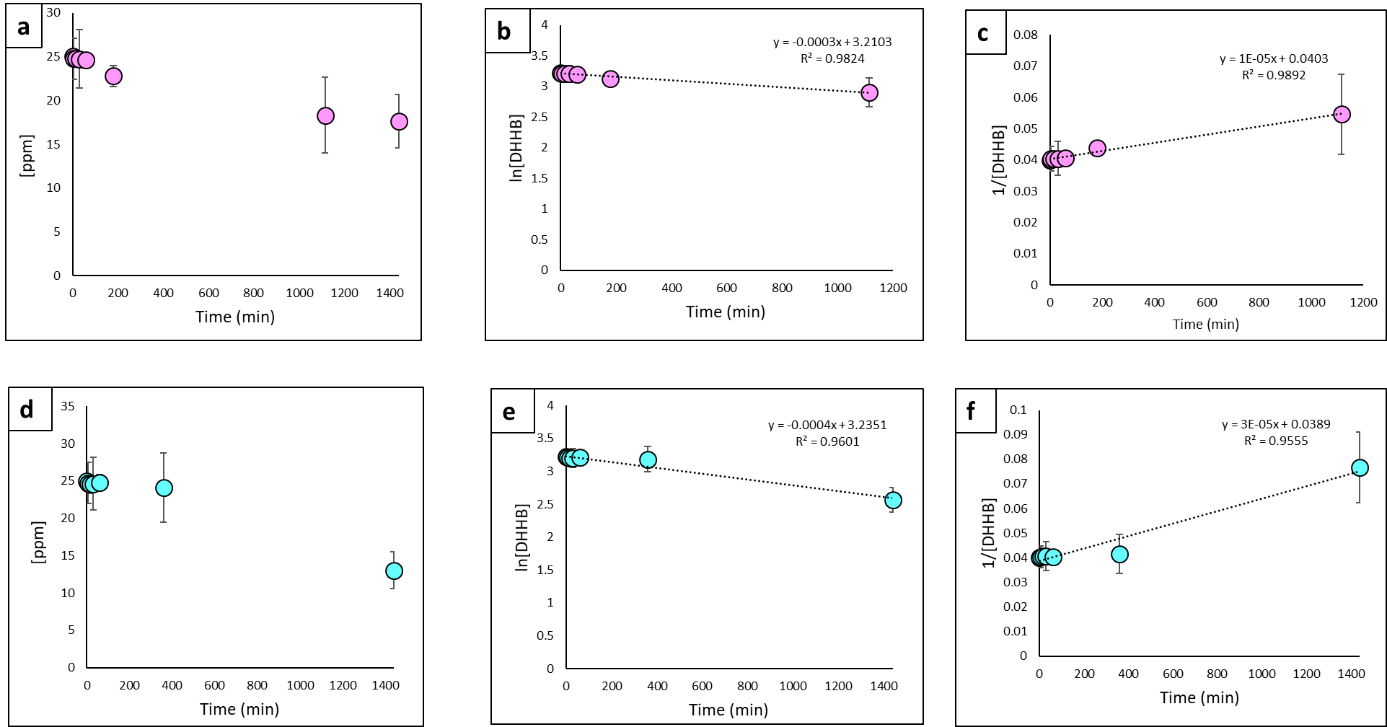


**Figure S5: a)** degradation of EHT in 24h for ZnO; **b)** EHT degradation by ZnO fitted with first order equation; **c)** data fitted with second order equation; **d)** degradation of EHT in 24h for TiO2; **e)** EHT degradation by TiO2 fitted with first order equation; **f)** data fitted with second order equation.

| Degradation of PSA by ZnO | | | | | | | | |
| --- | --- | --- | --- | --- | --- | --- | --- | --- |
| Degradation of PSA in 24 h | | | Degradation of PSA with first order equation | | | Degradation of PSA with second order equation | | |
| Time (min) | Conc.  [ppm] | SD | Time (min) | Conc.  ln[PBSA] | SD | Time  (min) | Conc.  1/[PBSA] | SD |
| 0 | 91.045 | 3.043 | 0 | 4.511 | 0.03342 | 0 | 0.011 | 0.000 |
| 5 | 83.632 | 10.824 | 5 | 4.426 | 0.129 | 5 | 0.012 | 0.002 |
| 15 | 74.191 | 2.882 | 15 | 4.306 | 0.038 | 15 | 0.013 | 0.001 |
| 30 | 65.210 | 6.078 | 30 | 4.177 | 0.093 | 30 | 0.015 | 0.001 |
| 60 | 51.916 | 7.480 | 60 | 3.949 | 0.144 | 60 | 0.019 | 0.003 |
| 360 | 7.804 | 0.962 | 360 | 2.054 | 0.123 | 360 | 0.128 | 0.016 |
| 1440 | 0.140 | 0.011 | 1440 | -1.962 | 0.080 | 1440 | 7.115 | 0.575 |

| Degradation of PSA by TiO2 | | | | | | | | |
| --- | --- | --- | --- | --- | --- | --- | --- | --- |
| Degradation of PSA in 24 h | | | Degradation of PSA with first order equation | | | Degradation of PSA with second order equation | | |
| Time (min) | Conc.  [ppm] | SD | Time (min) | Conc.  ln[PBSA] | SD | Time  (min) | Conc.  1/[PBSA] | SD |
| 0 | 80.8 | 3.68 | 0 | 4.39 | 0.05 | 0 | 0.01 | 0.00 |
| 5 | 75.5 | 8.85 | 5 | 4.32 | 0.12 | 5 | 0.01 | 0.00 |
| 15 | 70.1 | 8.59 | 15 | 4.25 | 0.12 | 15 | 0.01 | 0.00 |
| 30 | 64.3 | 8.77 | 30 | 4.16 | 0.14 | 30 | 0.02 | 0.00 |
| 60 | 53.8 | 3.15 | 60 | 3.98 | 0.06 | 60 | 0.02 | 0.00 |
| 360 | 0.89 | 0.16 | 360 | -0.11 | 0.17 | 360 | 1.12 | 0.19 |
| 1440 | 0.18 | 0.02 | 1440 | -1.72 | 0.13 | 1440 | 5.61 | 0.75 |

| Degradation of BEMT by ZnO | | | | | | | | |
| --- | --- | --- | --- | --- | --- | --- | --- | --- |
| Degradation of BEMT in 24 h | | | Degradation of BEMT with first order equation | | | Degradation of BEMT with second order equation | | |
| Time (min) | Conc.  [ppm] | SD | Time (min) | Conc.  ln[PBSA] | SD | Time  (min) | Conc.  1/[PBSA] | SD |
| 0 | 24.97 | 0.80 | 0 | 3.22 | 0.03 | 0 | 0.040 | 0.001 |
| 5 | 25.19 | 0.96 | 5 | 3.23 | 0.04 | 5 | 0.040 | 0.002 |
| 15 | 25.05 | 0.32 | 15 | 3.22 | 0.01 | 15 | 0.040 | 0.001 |
| 30 | 25.05 | 3.00 | 30 | 3.22 | 0.12 | 30 | 0.040 | 0.005 |
| 60 | 25.05 | 2.16 | 60 | 3.22 | 0.09 | 60 | 0.040 | 0.003 |
| 360 | 23.37 | 0.71 | 360 | 3.15 | 0.03 | 360 | 0.043 | 0.001 |
| 1440 | 23.32 | 1.53 | 1440 | 3.15 | 0.07 | 1440 | 0.043 | 0.003 |

| Degradation of BEMT by TiO2 | | | | | | | | |
| --- | --- | --- | --- | --- | --- | --- | --- | --- |
| Degradation of BEMT in 24 h | | | Degradation of BEMT with first order equation | | | Degradation of BEMT with second order equation | | |
| Time (min) | Conc.  [ppm] | SD | Time (min) | Conc.  ln[PBSA] | SD | Time  (min) | Conc.  1/[PBSA] | SD |
| 0 | 27.26 | 1.30 | 0 | 3.31 | 0.05 | 0 | 0.037 | 0.002 |
| 5 | 26.91 | 1.13 | 5 | 3.29 | 0.04 | 5 | 0.037 | 0.002 |
| 15 | 27.14 | 2.65 | 15 | 3.30 | 0.10 | 15 | 0.037 | 0.004 |
| 30 | 26.82 | 3.75 | 30 | 3.29 | 0.14 | 30 | 0.037 | 0.005 |
| 60 | 25.63 | 1.54 | 60 | 3.24 | 0.06 | 60 | 0.039 | 0.002 |
| 360 | 24.83 | 0.56 | 360 | 3.21 | 0.02 | 360 | 0.040 | 0.001 |
| 1440 | 24.71 | 3.56 | 1440 | 3.21 | 0.14 | 1440 | 0.040 | 0.006 |

| Degradation of OMC by ZnO | | | | | | | | |
| --- | --- | --- | --- | --- | --- | --- | --- | --- |
| Degradation of OMC in 24 h | | | Degradation of OMC with first order equation | | | Degradation of OMC with second order equation | | |
| Time (min) | Conc.  [ppm] | SD | Time (min) | Conc.  ln[PBSA] | SD | Time  (min) | Conc.  1/[PBSA] | SD |
| 0 | 30.00 | 0.46 | 0 | 3.40 | 0.02 | 0 | 0.033 | 0.001 |
| 5 | 25.46 | 3.06 | 5 | 3.24 | 0.12 | 5 | 0.039 | 0.005 |
| 15 | 23.45 | 0.77 | 15 | 3.16 | 0.03 | 15 | 0.043 | 0.001 |
| 30 | 21.48 | 3.13 | 30 | 3.07 | 0.15 | 30 | 0.047 | 0.007 |
| 60 | 19.64 | 0.06 | 60 | 2.98 | 0.00 | 60 | 0.051 | 0.000 |
| 360 | 12.59 | 1.95 | 360 | 2.53 | 0.15 | 360 | 0.079 | 0.012 |
| 1440 | 2.79 | 0.46 | 1440 | 1.03 | 0.16 | 1440 | 0.359 | 0.059 |

| Degradation of OMC by TiO2 | | | | | | | | |
| --- | --- | --- | --- | --- | --- | --- | --- | --- |
| Degradation of OMC in 24 h | | | Degradation of OMC with first order equation | | | Degradation of OMC with second order equation | | |
| Time (min) | Conc.  [ppm] | SD | Time (min) | Conc.  ln[PBSA] | SD | Time  (min) | Conc.  1/[PBSA] | SD |
| 0 | 31.45 | 0.95 | 0 | 3.45 | 0.03 | 0 | 0.03 | 0.00 |
| 5 | 27.72 | 0.34 | 5 | 3.32 | 0.01 | 5 | 0.04 | 0.00 |
| 15 | 25.61 | 1.28 | 15 | 3.24 | 0.05 | 15 | 0.04 | 0.00 |
| 30 | 23.07 | 0.31 | 30 | 3.14 | 0.01 | 30 | 0.04 | 0.00 |
| 60 | 19.88 | 1.78 | 60 | 2.99 | 0.09 | 60 | 0.05 | 0.00 |
| 360 | 0.80 | 0.18 | 360 | -0.23 | 0.23 | 360 | 1.25 | 0.28 |
| 1440 | 0.30 | 0.08 | 1440 | -1.19 | 0.25 | 1440 | 3.29 | 0.81 |

| Degradation of OCR by ZnO | | | | | | | | |
| --- | --- | --- | --- | --- | --- | --- | --- | --- |
| Degradation of OCR in 24 h | | | Degradation of OCR with first order equation | | | Degradation of OCR with second order equation | | |
| Time (min) | Conc.  [ppm] | SD | Time (min) | Conc.  ln[PBSA] | SD | Time  (min) | Conc.  1/[PBSA] | SD |
| 0 | 29.91 | 1.44 | 0 | 3.40 | 0.05 | 0 | 0.033 | 0.002 |
| 5 | 28.14 | 4.20 | 5 | 3.34 | 0.15 | 5 | 0.036 | 0.005 |
| 15 | 27.01 | 0.71 | 15 | 3.30 | 0.03 | 15 | 0.037 | 0.001 |
| 30 | 26.60 | 1.03 | 30 | 3.28 | 0.04 | 30 | 0.038 | 0.001 |
| 60 | 25.74 | 2.40 | 60 | 3.25 | 0.09 | 60 | 0.039 | 0.004 |
| 360 | 18.92 | 1.15 | 360 | 2.94 | 0.06 | 360 | 0.053 | 0.003 |
| 1440 | 14.57 | 0.87 | 1440 | 2.68 | 0.06 | 1440 | 0.069 | 0.004 |

| Degradation of OCR by TiO2 | | | | | | | | |
| --- | --- | --- | --- | --- | --- | --- | --- | --- |
| Degradation of OCR in 24 h | | | Degradation of OCR with first order equation | | | Degradation of OCR with second order equation | | |
| Time (min) | Conc.  [ppm] | SD | Time (min) | Conc.  ln[PBSA] | SD | Time  (min) | Conc.  1/[PBSA] | SD |
| 0 | 29.4 | 1.17 | 0 | 3.38 | 0.04 | 0 | 0.03 | 0.00 |
| 5 | 28.1 | 0.03 | 5 | 3.33 | 0.00 | 5 | 0.04 | 0.00 |
| 15 | 27.2 | 3.11 | 15 | 3.30 | 0.11 | 15 | 0.04 | 0.00 |
| 30 | 26.2 | 2.54 | 30 | 3.27 | 0.10 | 30 | 0.04 | 0.00 |
| 60 | 24.6 | 0.48 | 60 | 3.20 | 0.02 | 60 | 0.04 | 0.00 |
| 360 | 5.87 | 0.30 | 360 | 1.77 | 0.05 | 360 | 0.17 | 0.01 |
| 1440 | 0.07 | 0.02 | 1440 | -2.60 | 0.25 | 1440 | 13.5 | 3.32 |

| Degradation of DHHB by ZnO | | | | | | | | |
| --- | --- | --- | --- | --- | --- | --- | --- | --- |
| Degradation of OCR in 24 h | | | Degradation of OCR with first order equation | | | Degradation of OCR with second order equation | | |
| Time (min) | Conc.  [ppm] | SD | Time (min) | Conc.  ln[PBSA] | SD | Time  (min) | Conc.  1/[PBSA] | SD |
| 0 | 27.0 | 0.28 | 0 | 3.30 | 0.01 | 0 | 0.037 | 0.000 |
| 5 | 26.2 | 2.93 | 5 | 3.27 | 0.11 | 5 | 0.038 | 0.004 |
| 15 | 26.é | 2.06 | 15 | 3.26 | 0.08 | 15 | 0.038 | 0.003 |
| 30 | 26.& | 0.74 | 30 | 3.26 | 0.03 | 30 | 0.038 | 0.001 |
| 60 | 26.1 | 0.29 | 60 | 3.26 | 0.01 | 60 | 0.038 | 0.000 |
| 360 | 24.8 | 4.78 | 360 | 3.21 | 0.19 | 360 | 0.040 | 0.008 |
| 1440 | 18.6 | 0.65 | 1440 | 2.93 | 0.04 | 1440 | 0.054 | 0.002 |

| Degradation of DHHB by TiO2 | | | | | | | | |
| --- | --- | --- | --- | --- | --- | --- | --- | --- |
| Degradation of OCR in 24 h | | | Degradation of OCR with first order equation | | | Degradation of OCR with second order equation | | |
| Time (min) | Conc.  [ppm] | SD | Time (min) | Conc.  ln[PBSA] | SD | Time  (min) | Conc.  1/[PBSA] | SD |
| 0 | 27.00 | 0.99 | 0 | 3.30 | 0.04 | 0 | 0.04 | 0.00 |
| 5 | 23.65 | 1.72 | 5 | 3.16 | 0.07 | 5 | 0.04 | 0.00 |
| 15 | 22.43 | 1.53 | 15 | 3.11 | 0.07 | 15 | 0.04 | 0.00 |
| 30 | 21.80 | 0.85 | 30 | 3.08 | 0.04 | 30 | 0.05 | 0.00 |
| 60 | 21.49 | 3.04 | 60 | 3.07 | 0.14 | 60 | 0.05 | 0.01 |
| 360 | 19.26 | 4.67 | 360 | 2.96 | 0.24 | 360 | 0.05 | 0.01 |
| 1440 | 11.55 | 1.93 | 1440 | 2.45 | 0.17 | 1440 | 0.09 | 0.01 |

**Physico-chemical properties of organic filters.**

| Trade Name | INCI name | Acronym | MW | log P | ε filters | Peak (nm) |
| --- | --- | --- | --- | --- | --- | --- |
| Tinosorb® S | Bis-Ethylhexyloxyphenol Methoxyphenyl Triazine7 | BEMT | 627.8 | 10.4 | 405302 | 310 |
| Uvinul® A plus Grasnular | Diethylamino Hydroxybenzoyl Hexyl Benzoate8 | DHHB | 397.51 | 6.5 | 39000 | 354 |
| Uvin® T 150 | Ethylhexyl Triazone9 | EHT | 823.1 | 14.5 | 131497 | 314 |
| Parsol® HS | Phenylbenzimidazole Sulfonic Acid10 | PSA | 274.3 | 2 | 24100 | 302 |
| Uvin® MC 80 | Ethylhexyl Methoxycinnamate11 | OMC | 290.4 | 5.3 | 26250 | 310 |
| Parsol® 340 | Octocrylene12 | OCR | 361.48 | 7.1 | 12308 | 307 |

**Table S1:** chemical-physical characteristic for analyzed organic filters.
